# Supplementary material for: Integrated electrofluidic circuits: pressure sensing with analog and digital operation functionalities for microfluidics
Source: Royal Society of Chemistry journal article supplement (doi:10.1039/c2lc40436b), 2012-01-01
Supplement: c2lc40436b.pdf [file c2lc40436b.pdf]

## Integrated electrofluidic circuits: pressure sensing with analog and digital operation functionalities for microfluidics

Chueh-Yu Wu, Jau-Ching Lu, Man-Chi Liu, and Yi-Chung Tung\*

Research Center for Applied Sciences, Academia Sinica, Taipei 11529, Taiwan. Fax: +886 2 2782 6680; Tel: +886 2 2789 8000;  
E-mail: tungy@gate.sinica.edu.tw

### Supporting Information

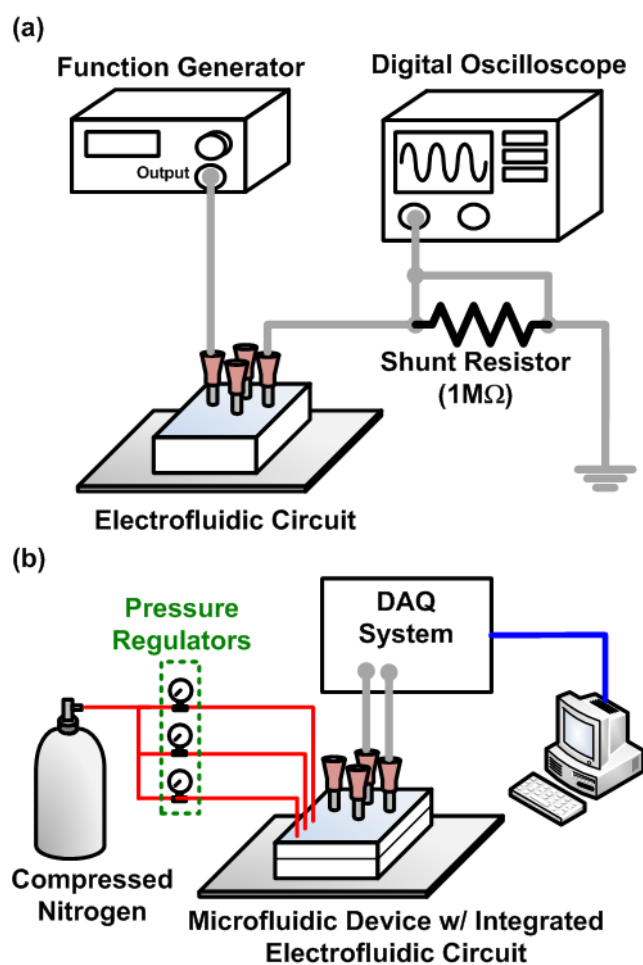

**Fig. S1** Illustration of experimental setups for (a) impedance spectrum characterization of an electrofluidic circuit, and (b) evaluation of electrofluidic circuits capable of conducting analog and digital operations of the applied pressures.

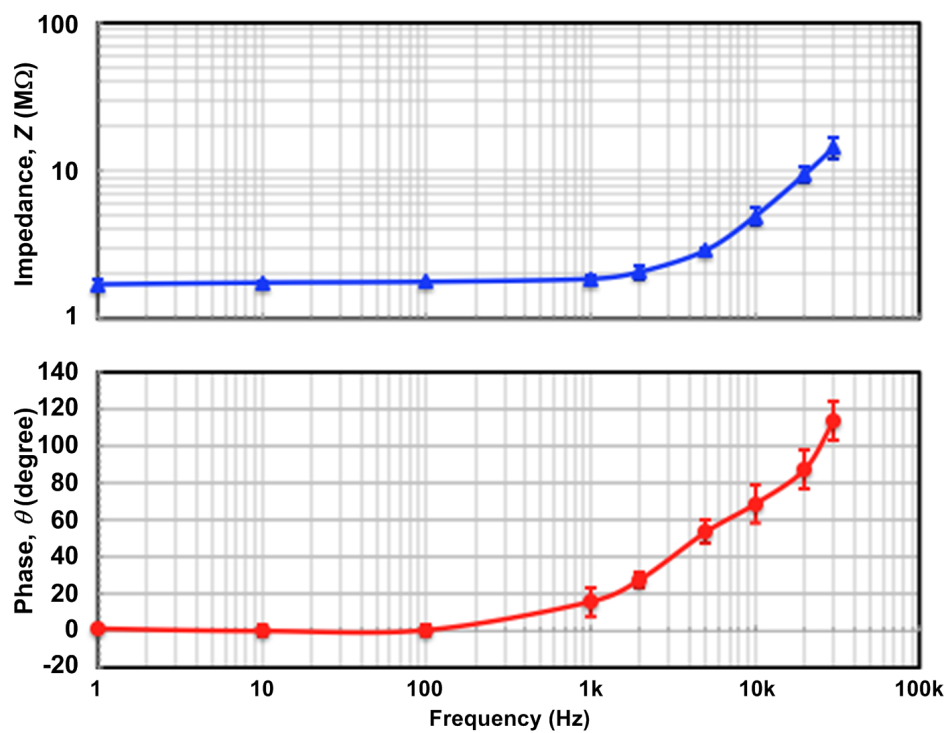

**Fig. S2** Impedance spectrum of electrofluidic Wheatstone bridge used for analog operations.
